# Supplementary figures and images for: The synergistic effect in Co–Ce oxides for catalytic oxidation of diesel soot
Source: Royal Society of Chemistry journal article supplement (doi:10.1039/c4cy01141d), 2014-11-04

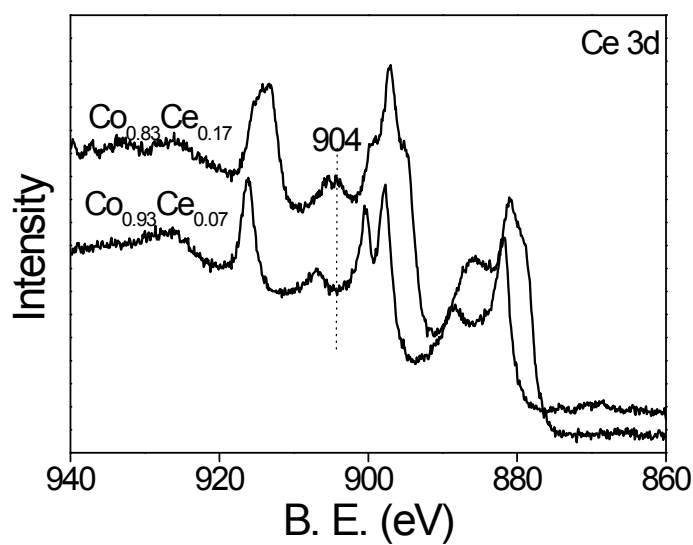

**Fig. S1** XPS data for Ce 3d spectrum of  $\text{Co}_{0.93}\text{Ce}_{0.07}$  and  $\text{Co}_{0.83}\text{Ce}_{0.17}$ .

Supplement: c4cy01141d1.pdf [file c4cy01141d1.pdf]
